# Supplementary material
Source: PubMed Central journal article supplement (PMC6781106)
Supplement: 41437_2019_185_MOESM1_ESM.pdf [file 41437_2019_185_MOESM1_ESM.pdf]

## Supplemental Methods

We compute effects of indirect assortative mating on genetic parameters in Figure 1 following equations derived by Gianola (GIANOLA 1982). Specifically let  $A$  and  $F$  be two phenotypes in a population. Furthermore assume that under random mating in said population the heritabilities of  $A$  and  $F$  are  $h_A^2$  and  $h_F^2$  respectively and their genetic correlation is  $\rho_g$ . Assortative mating on phenotype  $A$  leads to changes in the heritabilities of  $A$  and  $F$  as well as their genetic correlations, and under continued assortative mating these quantities will reach an equilibrium. Specifically under continued assortment on  $A$  with partner correlation  $\rho_{couple}$  the equilibrium heritability of the assortment trait  $A$  is given by

$$\hat{h}_A^2 = \frac{\hat{\sigma}_{g_A}^2}{\hat{\sigma}_{g_A}^2 + \sigma_{e_A}^2} \text{ where } \hat{\sigma}_{g_A}^2 = \frac{2h_A^2 - 1 + \sqrt{1 - 4\rho_{couple}h_A^2(1 - h_A^2)}}{2(1 - \rho_{couple})}$$

the equilibrium genetic correlation is given by

$$\hat{\rho}_g = \rho_g \left(1 - \rho_{couple} \hat{h}_A^2 (1 - \rho_g^2)\right)^{-\frac{1}{2}}$$

and the equilibrium heritability of the focal trait  $F$  given by

$$\hat{h}_F^2 = \frac{\hat{\sigma}_{g_F}^2}{\hat{\sigma}_{g_F}^2 + \sigma_{e_F}^2} \text{ where } \hat{\sigma}_{g_F}^2 = \frac{2h_F^2 - 1 + \sqrt{1 - 4\rho_{couple}\hat{\rho}_g^2 h_A^2 (1 - h_A^2)}}{2(1 - \rho_{couple}\hat{\rho}_g^2)}.$$

We provide an online calculator to compute the effects of direct and indirect assortative mating on genetic parameters (<https://konradrawlik.github.io/IndirectAssortativeMating/>).

**Figure S1:** Density of correlations between parent's life spans for 10,000 fictitious couples with assortment structure due to Birth Location and Birth Year matching that of observed couples in either the UK Biobank or Familinx cohort. The black vertical line indicates the correlations observed in real couples in the respective cohort.

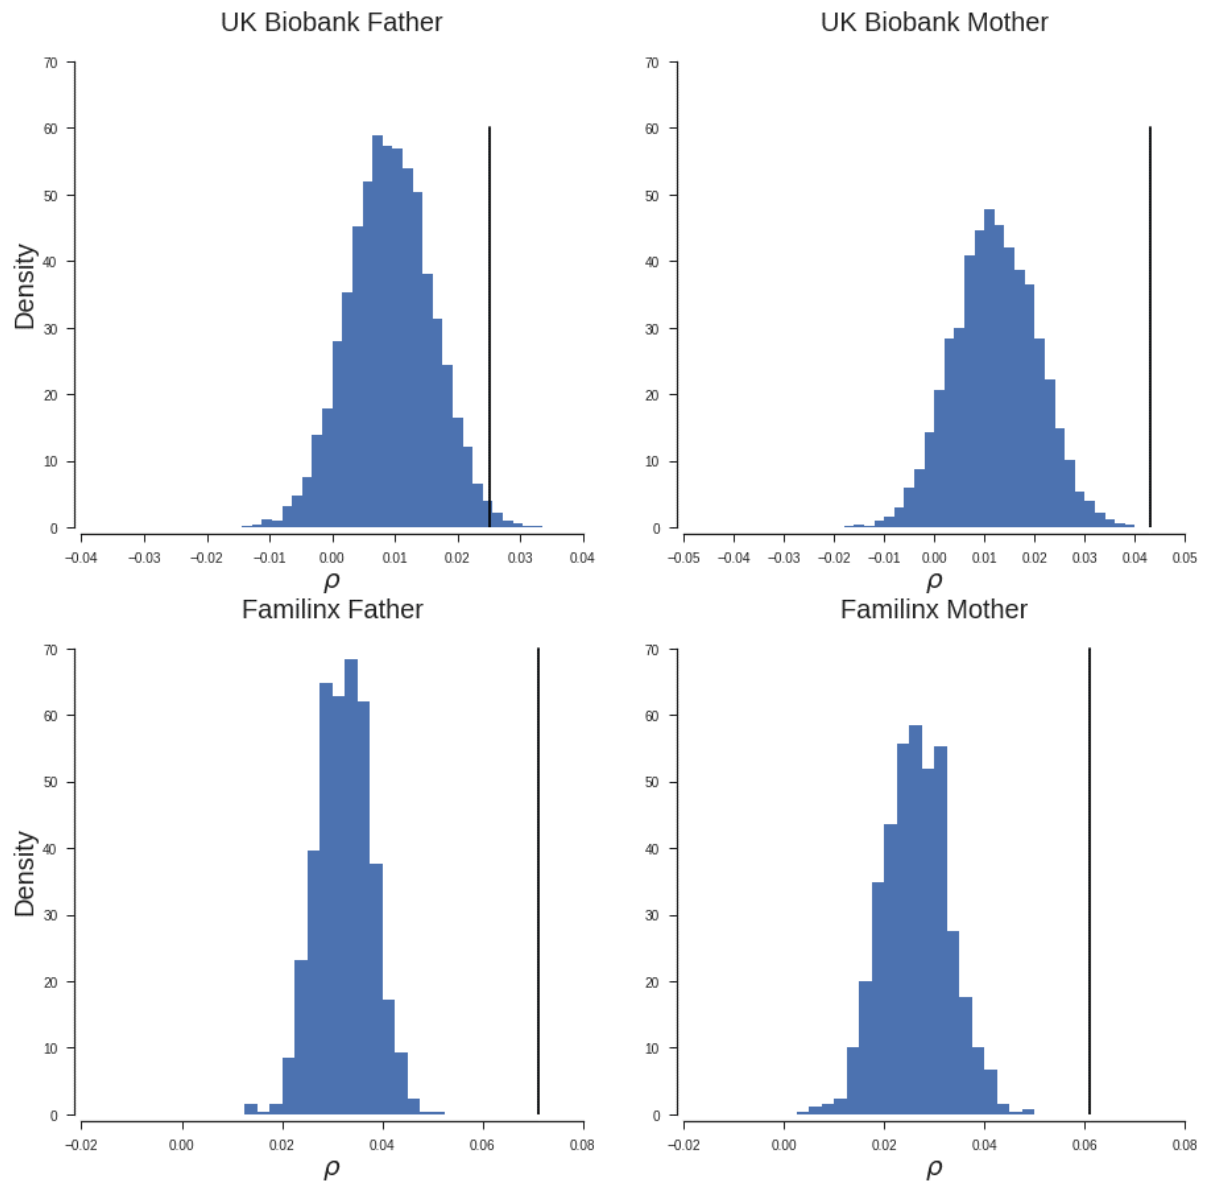

**Table S1: Significant ( $P < 0.05$ ) partner phenotypic correlations ( $\rho_y^{\text{couple}}$ ) for potential explanatory variables in couples in the UK Biobank.**

|                |            | Male Partner |             |             |             |             |             |
|----------------|------------|--------------|-------------|-------------|-------------|-------------|-------------|
|                |            | Birth Year   | Townsend    | Height      | WHR         | BMI         | Pack Years  |
| Female Partner | Birth Year | <b>0.91</b>  | 0.04        | 0.14        | -0.14       | -0.01       | -0.17       |
|                | Townsend   | 0.04         | <b>1.00</b> | -0.07       | 0.08        | 0.07        | 0.14        |
|                | Height     | 0.15         | -0.06       | <b>0.26</b> | -0.06       | -0.04       | -0.07       |
|                | WHR        | -0.15        | 0.09        | -0.06       | <b>0.19</b> | 0.16        | 0.11        |
|                | BMI        | -0.07        | 0.09        | -0.07       | 0.22        | <b>0.24</b> | 0.08        |
|                | Pack Years | -0.10        | 0.17        | -0.06       | 0.12        | 0.09        | <b>0.34</b> |

Townsend = Townsend Deprivation Index, WHR = Waist to Hip ratio, BMI = Body Mass Index

**Table S2: Residual partner correlations in different models of parental longevity in couples in the UK Biobank.**

| Model                     | N     | Father |      |      | Mother |        |                    |      |
|---------------------------|-------|--------|------|------|--------|--------|--------------------|------|
|                           |       | $\rho$ | p    | %    | N      | $\rho$ | p                  | %    |
| Null                      | 22824 | 0.025  | 0.01 | 1.00 | 15026  | 0.043  | $2 \times 10^{-4}$ | 1.00 |
| Birth Info.               | 22824 | 0.012  | 0.21 | 0.47 | 15026  | 0.019  | 0.10               | 0.44 |
| All                       | 22824 | 0.006  | 0.52 | 0.25 | 15026  | 0.013  | 0.24               | 0.32 |
| <b>Individual Factors</b> |       |        |      |      |        |        |                    |      |
| BMI                       | 22824 | 0.010  | 0.28 | 0.40 | 15026  | 0.017  | 0.13               | 0.41 |
| WHR                       | 22824 | 0.010  | 0.28 | 0.41 | 15026  | 0.017  | 0.14               | 0.40 |
| Height                    | 22824 | 0.012  | 0.21 | 0.47 | 15026  | 0.018  | 0.11               | 0.43 |
| Townsend                  | 22824 | 0.009  | 0.32 | 0.38 | 15026  | 0.017  | 0.14               | 0.39 |
| Pack Years                | 22824 | 0.008  | 0.37 | 0.34 | 15026  | 0.017  | 0.14               | 0.39 |

Null = no covariates, Birth Info.= Birth Year and Birth Location, All = Birth Info and all considered covariates and their squares, Models for individual covariates, contain Birth Info., the covariate and the covariate squared, N = number of couples,  $\rho$  = Pearson's correlation of residuals,  $P$  = pvalue for  $\rho = 0$ , % = fraction of  $\rho$  under null model remaining

**Table S3: Estimates of SNP heritability for parental longevity in the UK Biobank.**

|        | N     | $h^2$    |       |
|--------|-------|----------|-------|
|        |       | estimate | s.e.  |
| Father | 79216 | 0.04     | 0.005 |
| Mother | 64002 | 0.03     | 0.006 |

N = number of individuals used in fitting model,  $h^2$  = heritability

Table S4: Measures of association of family history in all couples in the UK Biobank.

|                                                        | <b>N</b>                            | <b>MI</b> | <b><math>P_{MI}</math></b> | <b><math>P_{\chi^2}</math></b> | <b><math>P_{\rho}</math></b> |                     |
|--------------------------------------------------------|-------------------------------------|-----------|----------------------------|--------------------------------|------------------------------|---------------------|
| <b>Father (<math>\rho_{y^{\sigma^2}inlaws}</math>)</b> | <b>Heart disease</b>                | 69751     | 0.0003                     | <0.001                         | $1 \times 10^{-10}$          | $6 \times 10^{-11}$ |
|                                                        | <b>Stroke</b>                       | 69751     | 0.00006                    | <0.001                         | 0.0051                       | 0.003               |
|                                                        | <b>Lung cancer</b>                  | 68129     | 0.0001                     | <0.001                         | 0.0002                       | $1 \times 10^{-4}$  |
|                                                        | <b>Bowel cancer</b>                 | 68129     | 0.00004                    | 0.03                           | 0.0169                       | 0.009               |
|                                                        | <b>Chronic bronchitis/emphysema</b> | 69751     | 0.00025                    | <0.001                         | $2 \times 10^{-9}$           | $2 \times 10^{-9}$  |
|                                                        | <b>Hypertension</b>                 | 69751     | 0.0011                     | <0.001                         | $5 \times 10^{-36}$          | $1 \times 10^{-35}$ |
|                                                        | <b>Diabetes</b>                     | 69751     | 0.00002                    | 0.11                           | 0.1366                       | 0.067               |
|                                                        | <b>Alzheimer's disease/dementia</b> | 69751     | 0.00012                    | <0.001                         | $2 \times 10^{-5}$           | $2 \times 10^{-5}$  |
|                                                        | <b>Parkinson's disease</b>          | 68129     | $3 \times 10^{-10}$        | 0.5                            | 0.5823                       | 0.267               |
|                                                        | <b>Severe depression</b>            | 68129     | 0.00001                    | 0.13                           | 0.2193                       | 0.103               |
|                                                        | <b>Prostate cancer</b>              | 68129     | 0.00005                    | <0.001                         | 0.0073                       | 0.004               |
| <b>Mother (<math>\rho_{y^{\sigma^2}inlaws}</math>)</b> | <b>Heart disease</b>                | 73308     | 0.00065                    | <0.001                         | $7 \times 10^{-23}$          | $9 \times 10^{-23}$ |
|                                                        | <b>Stroke</b>                       | 73308     | 0.0003                     | <0.001                         | $2 \times 10^{-11}$          | $2 \times 10^{-11}$ |
|                                                        | <b>Lung cancer</b>                  | 72160     | 0.00012                    | <0.001                         | $1 \times 10^{-5}$           | $1 \times 10^{-5}$  |
|                                                        | <b>Bowel cancer</b>                 | 72160     | $3 \times 10^{-10}$        | 0.57                           | 0.533                        | 0.747               |
|                                                        | <b>Breast cancer</b>                | 72160     | $1 \times 10^{-10}$        | 0.64                           | 0.667                        | 0.325               |
|                                                        | <b>Chronic bronchitis/emphysema</b> | 73308     | 0.0001                     | <0.001                         | $1 \times 10^{-4}$           | $7 \times 10^{-5}$  |
|                                                        | <b>Hypertension</b>                 | 73308     | 0.00111                    | <0.001                         | $1 \times 10^{-37}$          | $7 \times 10^{-38}$ |
|                                                        | <b>Diabetes</b>                     | 73308     | 0.00007                    | <0.001                         | 0.001                        | 0.001               |
|                                                        | <b>Alzheimer's disease/dementia</b> | 73308     | 0.00035                    | <0.001                         | $1 \times 10^{-13}$          | $3 \times 10^{-13}$ |
|                                                        | <b>Parkinson's disease</b>          | 72160     | 0.00001                    | 0.33                           | 0.297                        | 0.13                |
|                                                        | <b>Severe depression</b>            | 72160     | 0.00005                    | <0.001                         | 0.009                        | 0.005               |

N=Number of Couples, MI = Mutual Information,  $P_{MI}$  = empirical permutation based P value based on MI,  $P_{\chi^2}$  = Chi Squared test P value,  $P_{\rho}$  = P value for polychoric correlations

**Table S5: Measures of association of family history in couples of self-reported controls in the UK Biobank.**

|                                                              | <b>N</b>                            | <b>MI</b> | <b><math>P_{MI}</math></b> | <b><math>P_{\chi^2}</math></b> |                     |
|--------------------------------------------------------------|-------------------------------------|-----------|----------------------------|--------------------------------|---------------------|
| <b>Father (<math>\rho_y^{\sigma^2 \text{inlaws}}</math>)</b> | <b>Heart disease</b>                | 47786     | 0.00019                    | <0.001                         | $2 \times 10^{-5}$  |
|                                                              | <b>Stroke</b>                       | 56239     | 0.00004                    | 0.01                           | 0.037               |
|                                                              | <b>Lung cancer</b>                  | 57571     | 0.00009                    | <0.001                         | 0.002               |
|                                                              | <b>Bowel cancer</b>                 | 56869     | 0.00006                    | 0.01                           | 0.009               |
|                                                              | <b>Chronic bronchitis/emphysema</b> | 55905     | 0.00020                    | <0.001                         | $2 \times 10^{-6}$  |
|                                                              | <b>Hypertension</b>                 | 29573     | 0.00151                    | <0.001                         | $7 \times 10^{-22}$ |
|                                                              | <b>Diabetes</b>                     | 52964     | $2 \times 10^{-7}$         | 0.76                           | 0.907               |
|                                                              | <b>Alzheimer's disease/dementia</b> | 58008     | 0.00012                    | <0.001                         | $1 \times 10^{-4}$  |
|                                                              | <b>Parkinson's disease</b>          | 57408     | $1 \times 10^{-6}$         | 0.71                           | 0.741               |
|                                                              | <b>Severe depression</b>            | 50056     | 0.00002                    | 0.17                           | 0.181               |
|                                                              | <b>Prostate cancer</b>              | 56596     | 0.00007                    | <0.001                         | 0.006               |
| <b>Mother (<math>\rho_y^{\sigma^2 \text{inlaws}}</math>)</b> | <b>Heart disease</b>                | 47786     | 0.00053                    | <0.001                         | $8 \times 10^{-13}$ |
|                                                              | <b>Stroke</b>                       | 56239     | 0.00029                    | <0.001                         | $6 \times 10^{-9}$  |
|                                                              | <b>Lung cancer</b>                  | 57571     | 0.00014                    | <0.001                         | $3 \times 10^{-5}$  |
|                                                              | <b>Bowel cancer</b>                 | 56869     | $4 \times 10^{-6}$         | 0.45                           | 0.514               |
|                                                              | <b>Breast cancer</b>                | 55075     | $3 \times 10^{-7}$         | 0.81                           | 0.868               |
|                                                              | <b>Chronic bronchitis/emphysema</b> | 55905     | 0.00007                    | <0.001                         | 0.003               |
|                                                              | <b>Hypertension</b>                 | 29573     | 0.00096                    | <0.001                         | $4 \times 10^{-14}$ |
|                                                              | <b>Diabetes</b>                     | 52964     | 0.00003                    | 0.09                           | 0.091               |
|                                                              | <b>Alzheimer's disease/dementia</b> | 58008     | 0.00038                    | <0.001                         | $7 \times 10^{-12}$ |
|                                                              | <b>Parkinson's disease</b>          | 57408     | 0.00001                    | 0.32                           | 0.331               |
|                                                              | <b>Severe depression</b>            | 50056     | 0.00005                    | <0.001                         | 0.025               |

N=Number of Couples, MI = Mutual Information,  $P_{MI}$ = empirical permutation based P value based on MI,  $P_{\chi^2}$ = Chi Squared test P value

**Table S6: Empirical P values for observed association of family history in UK Biobank couples compared to null distribution based on fictitious couples with matched mating structure based on year and place of birth.**

|                                     | <b>Father</b> | <b>Mother</b> |
|-------------------------------------|---------------|---------------|
| <b>Alzheimer's disease/dementia</b> | 0.0026        | <0.0001       |
| <b>Bowel cancer</b>                 | 0.0408        | 0.8155        |
| <b>Breast cancer</b>                | -             | 0.2781        |
| <b>Chronic bronchitis/emphysema</b> | <0.0001       | 0.0041        |
| <b>Diabetes</b>                     | 0.8072        | 0.1212        |
| <b>Heart disease</b>                | <0.0001       | <0.0001       |
| <b>Hypertension</b>                 | <0.0001       | <0.0001       |
| <b>Lung cancer</b>                  | 0.0316        | 0.0002        |
| <b>Parkinson's disease</b>          | 0.8469        | 0.3366        |
| <b>Prostate cancer</b>              | 0.0149        | -             |
| <b>Severe depression</b>            | 0.0732        | 0.0344        |
| <b>Stroke</b>                       | 0.0441        | 0.0074        |

**Table S7: Empirical P values for observed association of family history in UK Biobank couples compared to null distribution based on fictitious couples with matched mating structure based on participants' or parents' year of birth.**

|                            | <b>Father</b>    |               | <b>Mother</b>    |               |
|----------------------------|------------------|---------------|------------------|---------------|
|                            | <b>Offspring</b> | <b>Parent</b> | <b>Offspring</b> | <b>Parent</b> |
| <b>Alzheimer's</b>         | 0.007            | 0.026         | 0.315            | 0.356         |
| <b>Bowel cancer</b>        | 0.34             | 0.154         | 0.675            | 0.687         |
| <b>Breast cancer</b>       |                  |               | 0.629            | 0.67          |
| <b>Chronic bronchitis</b>  | 0.616            | 0.732         | 0.012            | 0.01          |
| <b>Diabetes</b>            | 0.171            | 0.186         | 0.325            | 0.312         |
| <b>Heart disease</b>       | 0.029            | 0.021         | 0.156            | 0.093         |
| <b>Hypertension</b>        | <0.001           | <0.001        | 0.001            | <0.001        |
| <b>Lung cancer</b>         | 0.034            | 0.038         | 0.018            | 0.013         |
| <b>Parkinson's disease</b> | 0.413            | 0.127         | 0.412            | 0.411         |
| <b>Prostate cancer</b>     | 0.475            | 0.439         |                  |               |
| <b>Severe depression</b>   | 0.685            | 0.695         | 0.033            | 0.032         |
| <b>Stroke</b>              | 0.871            | 0.888         | 0.112            | 0.128         |

**Table S8: Estimates of SNP heritability for parental family history of disease of UK**

**Biobank participants.**

|                                     |                                     | Controls             | Cases  | $h^2$  |        | $h_e^2$ |           |
|-------------------------------------|-------------------------------------|----------------------|--------|--------|--------|---------|-----------|
|                                     |                                     |                      |        | est.   | s.e.   | est.    | 95% CI    |
| <b>Father</b>                       | <b>Heart disease</b>                | 69,745               | 31,053 | 0.033  | 0.004  | 0.05    | 0.04-0.06 |
|                                     | <b>Stroke</b>                       | 86,219               | 14,579 | 0.005  | 0.0037 | 0.01    | 0.00-0.03 |
|                                     | <b>Lung cancer</b>                  | 90,372               | 9,088  | 0.009  | 0.0034 | 0.03    | 0.01-0.05 |
|                                     | <b>Bowel cancer</b>                 | 93,880               | 5,580  | 0.012  | 0.0038 | 0.05    | 0.02-0.08 |
|                                     | <b>Breast cancer</b>                | -                    | -      | -      | -      | -       | -         |
|                                     | <b>Chronic bronchitis/emphysema</b> | 89,434               | 11,364 | 0.022  | 0.0039 | 0.06    | 0.04-0.08 |
|                                     | <b>Hypertension</b>                 | 79,773               | 21,025 | 0.024  | 0.004  | 0.04    | 0.03-0.06 |
|                                     | <b>Diabetes</b>                     | 91,804               | 8,994  | 0.026  | 0.004  | 0.08    | 0.05-0.10 |
|                                     | <b>Alzheimer's disease/dementia</b> | 96,295               | 4,503  | 0.008  | 0.0036 | 0.04    | 0.00-0.07 |
|                                     | <b>Parkinson's disease</b>          | 97,142               | 2,318  | 0.003  | 0.0035 | 0.02    | 0.00-0.07 |
|                                     | <b>Severe depression</b>            | 95,986               | 3,474  | 0.008  | 0.0035 | 0.04    | 0.01-0.08 |
|                                     | <b>Prostate cancer</b>              | 92,526               | 6,934  | 0.001  | 0.0028 | 0.005   | 0.00-0.02 |
|                                     | <b>Mother</b>                       | <b>Heart disease</b> | 83,680 | 20,117 | 0.016  | 0.0036  | 0.03      |
| <b>Stroke</b>                       |                                     | 89,469               | 14,328 | 0.006  | 0.0034 | 0.01    | 0.00-0.03 |
| <b>Lung cancer</b>                  |                                     | 98,437               | 4,366  | 0.008  | 0.0034 | 0.04    | 0.01-0.07 |
| <b>Bowel cancer</b>                 |                                     | 97,576               | 5,227  | 0.012  | 0.0037 | 0.05    | 0.02-0.08 |
| <b>Breast cancer</b>                |                                     | 94,606               | 8,197  | 0.019  | 0.0038 | 0.06    | 0.04-0.09 |
| <b>Chronic bronchitis/emphysema</b> |                                     | 97,417               | 6,380  | 0.014  | 0.0037 | 0.05    | 0.03-0.08 |
| <b>Hypertension</b>                 |                                     | 73,402               | 30,395 | 0.031  | 0.0039 | 0.05    | 0.04-0.06 |
| <b>Diabetes</b>                     |                                     | 94,316               | 9,481  | 0.03   | 0.0039 | 0.09    | 0.07-0.11 |
| <b>Alzheimer's disease/dementia</b> |                                     | 95,336               | 8,461  | 0.022  | 0.0038 | 0.07    | 0.05-0.09 |
| <b>Parkinson's disease</b>          |                                     | 101,229              | 1,574  | 0.001  | 0.0033 | 0.01    | 0.00-0.08 |
| <b>Severe depression</b>            |                                     | 96,333               | 6,470  | 0.009  | 0.0037 | 0.03    | 0.01-0.06 |
| <b>Prostate cancer</b>              |                                     | -                    | -      | -      | -      | -       | -         |

Controls/Cases= number of controls and cases used to fit the model,  $h^2$  = heritability on the observed scale,  $h_e^2$ =

heritability on the liability scale

**Table S9: Within couple correlations of genetic values ( $\rho_g^{\text{couple}}$ ) for family history in genotyped couples in the UK Biobank, based on genetic effects adjusted for birth year, birth location and parent's age.**

|                                     | Paternal |      | Maternal |       | Combined <sup>†</sup> |                      |
|-------------------------------------|----------|------|----------|-------|-----------------------|----------------------|
|                                     | $\rho$   | $P$  | $\rho$   | $P$   | $\rho$                | $P$                  |
| <b>Heart disease</b>                | 0.011    | 0.28 | 0.016    | 0.11  | 0.013                 | 0.03                 |
| <b>Stroke</b>                       | 0        | 0.97 | 0.02     | 0.05  | 0.010                 | 0.17                 |
| <b>Lung cancer</b>                  | -0.007   | 0.47 | 0.012    | 0.22  | 0.002                 | 0.40                 |
| <b>Bowel cancer</b>                 | -0.001   | 0.93 | -0.016   | 0.11  | -0.008                | 0.13                 |
| <b>Breast cancer</b>                | -        | -    | -0.003   | 0.77  | -                     | -                    |
| <b>Chronic bronchitis/emphysema</b> | -0.003   | 0.79 | 0.03     | 0.003 | 0.014                 | 0.20                 |
| <b>Hypertension</b>                 | 0.023    | 0.02 | 0.028    | 0.005 | 0.025                 | $1.7 \times 10^{-4}$ |
| <b>Diabetes</b>                     | 0.004    | 0.7  | 0.008    | 0.41  | 0.006                 | 0.20                 |
| <b>Alzheimer's disease/dementia</b> | -0.002   | 0.86 | 0.002    | 0.83  | 0.000                 | 0.49                 |
| <b>Parkinson's disease</b>          | -0.001   | 0.89 | -0.001   | 0.93  | -0.001                | 0.43                 |
| <b>Severe depression</b>            | 0.015    | 0.12 | -0.008   | 0.43  | 0.004                 | 0.37                 |
| <b>Prostate cancer</b>              | 0.007    | 0.46 | -        | -     | -                     | -                    |

<sup>†</sup>meta-analysis of paternal and maternal correlations,  $\rho$  = Pearson's correlation of residuals,  $P$  = pvalue for  $\rho=0$



**Table S10: Within couple correlations of genetic values ( $\rho_g^{\text{couple}}$ ) for family history, separate for maternal and paternal family history, in genotyped couples in the UK Biobank.**

|                           | Paternal |              |          | Maternal |              |          |
|---------------------------|----------|--------------|----------|----------|--------------|----------|
|                           | $\rho$   | 95% CI       | <i>P</i> | $\rho$   | 95% CI       | <i>P</i> |
| <b>Heart disease</b>      | 0.013    | -0.006-0.033 | 0.18     | 0.02     | 0.000-0.040  | 0.05     |
| <b>Stroke</b>             | 0.002    | -0.018-0.021 | 0.85     | 0.024    | 0.005-0.044  | 0.01     |
| <b>Lung cancer</b>        | -0.006   | -0.025-0.014 | 0.56     | 0.016    | -0.004-0.035 | 0.12     |
| <b>Bowel cancer</b>       | -0.001   | -0.020-0.019 | 0.95     | -0.016   | -0.36-0.003  | 0.1      |
| <b>Breast cancer</b>      | -        | -            | -        | -0.004   | -0.023-0.015 | 0.68     |
| <b>Chronic bronchitis</b> | 0.006    | -0.013-0.026 | 0.52     | 0.032    | 0.013-0.052  | 0.001    |
| <b>Hypertension</b>       | 0.03     | 0.011-0.050  | 0.002    | 0.03     | 0.011-0.050  | 0.002    |
| <b>Diabetes</b>           | 0.009    | -0.011-0.028 | 0.37     | 0.01     | -0.010-0.029 | 0.32     |
| <b>Alzheimer's</b>        | 0.001    | -0.18-0.021  | 0.9      | 0.007    | -0.012-0.027 | 0.45     |
| <b>Parkinson's</b>        | -0.002   | -0.022-0.017 | 0.82     | -0.001   | -0.020-0.019 | 0.95     |
| <b>Severe depression</b>  | 0.017    | -0.003-0.036 | 0.1      | -0.01    | -0.030-0.009 | 0.3      |
| <b>Prostate cancer</b>    | 0.009    | -0.010-0.029 | 0.34     | -        | -            | -        |

$\rho$  = Pearson's correlation of residuals, *P* = pvalue for  $\rho=0$
